# Supplementary material
Source: publisher figshare collection journal article supplement (https://asha.figshare.com/articles/dataset/_/23681703)
Supplement: Supplementary file 1 [file 1]

## Supplemental Material S1. Linguistic characteristics of speech–noise conditions.

| Condition    | Average $f_0$                                               | Rate   | Flesch Reading Ease | Flesch-Kincaid Grade Level |
|--------------|-------------------------------------------------------------|--------|---------------------|----------------------------|
| Conversation | Speaker 1: 257 Hz<br>Speaker 2: 279 Hz<br>Speaker 3: 282 Hz | 154.00 | 93                  | 2                          |
| Monologue    | 129 Hz                                                      | 162.33 | 73                  | 7                          |
| Phone Call   | 118 Hz                                                      | 121.50 | 98                  | 1                          |

*Note.* Rate was measured as words per minute. “Flesch Reading Ease” and “Flesch-Kincaid Grade Level” were measured by orthographically transcribing each noise sample verbatim and using the Microsoft Word automated readability scores.
