# Supplementary material
Source: publisher figshare collection journal article supplement (https://asha.figshare.com/articles/dataset/_/23681703)
Supplement: Supplementary file 3 [file 1]

## Supplemental Material S3. Sample person with aphasia (PWA) Computerized Language Analysis (CLAN) file.

This and other productions of "um" were coded as lexical fillers.

This is an example of a repetition, since "Neal is" is said again after the filler, "um".

This is a substitution of a bound morpheme error because the word "go" is used in the incorrect tense.

This is an example of a revision because the speaker goes on to restructure their thought.

An abandoned utterance was coded as an aposiopesis as well as missing content.

The speaker substituted the word "new" for the word "old", which is a semantic paraphasia.

The speaker exhibited several phonological paraphasias as they tried to produce their target word.

```
@Window: 68_712_677_654_-1_-1_898_0_898_0
@Begin
@Languages: eng
@Participants: PAR Participant, INV Investigator
@ID: eng|corpus|PAR|0.00.|male|Anomic||Participant||0.0|
@ID: eng|corpus|INV||||Investigator|||
@Media: 08_loan_pink_mono_audio
*PAR: okay <um> [* fil] <Neal is> [/] <um> [* fil] Neil <is the> [/] &la <uh> [* fil] &g <go> [* m]
to the <um> [* fil] school. *
*PAR: and <no money <is> [* f] &l <um> [* fil] Neil> [* pg]. *
*PAR: and [* oc] <go> [* m] to the bank and [* oc] <loan the> [/] <um um> [* fil] loan the
money and <uh um uh> [* fil] <no> [/] <um> [* fil] &g <um> [* fil] <loan> [/] <uh um> [* fil]
<be <um> [* fil] no> [/] &b &g <um> [* fil] <Lindsey no> [/] <um> [* fil]
<go to the bank and loan the money> [* s:per]. *
*PAR: <a <um> [* fil] &u no> [/] <they no> [/] <husband no> [/] <um> [* fil] <Grandma no> [/]
<uh> [* fil] <&da> [/] <<no> [/] no> [/] <kay um> [* fil] <mom is the no> [/] <uh> [* fil] &sel
<no> [/] <give the> [/] <um> [* fil] give the &c car <um> [* fil] [* oc] loan. *
*PAR: <um uh um> [* fil] <new no> [/] <<new> [* s:r] car is awful> [* exc]. *
*PAR: and <um> [* fil] <grandma no> [/] <uh> [* fil] a <um> [* fil] loan the car <um> [* fil]. *
*PAR: 0 [* ofw] sandwich is awful in the <uh> [* fil] <flow> [* p] <grow> [* p] <uh> [* fil]
<bro> [* p] <um> [* fil] blownee@u [* n]. *
*PAR: and <uh um> [* fil] money is the [* ap][* oc]. *
*PAR: <uh> [* fil] [* oc] <wishing> [* s:r] the loan. *
*PAR: 0 [* ofw] <sandwich is awful> [* s:per]. *
*PAR: and <uh> [* fil] and &l <grade is awful no> [/] <grades <is> [* m] awful> [* exc]
and <um oh> [* fil]. *
@End
```
