# Supplementary material
Source: publisher figshare collection journal article supplement (https://asha.figshare.com/articles/dataset/_/23681703)
Supplement: Supplementary file 4 [file 1]

**Supplemental Material S4.** Independent sample *t*-test results for background noise effects.

|                           | Aphasia  |           |          |          | Control  |           |          |          |
|---------------------------|----------|-----------|----------|----------|----------|-----------|----------|----------|
|                           | <i>t</i> | <i>df</i> | <i>p</i> | <i>d</i> | <i>t</i> | <i>df</i> | <i>p</i> | <i>d</i> |
| <i>f</i> <sub>0</sub>     |          |           |          |          |          |           |          |          |
| Conversation              | 2.465    | 10        | .033     | 0.74     | 5.434    | 10        | <.001    | 1.64     |
| Monologue                 | 1.027    | 10        | .329     | 0.31     | 2.513    | 10        | .031     | 0.76     |
| Phone Call                | 0.151    | 9         | .884     | 0.05     | 2.218    | 10        | .051     | 0.67     |
| Cocktail Party            | 2.262    | 10        | .047     | 0.68     | 3.473    | 10        | .006     | 1.05     |
| Pink                      | 1.519    | 9         | .163     | 0.48     | 4.170    | 10        | .002     | 1.26     |
| <i>dB</i>                 |          |           |          |          |          |           |          |          |
| Conversation              | 2.937    | 10        | .015     | 0.89     | 5.982    | 9         | <.001    | 1.89     |
| Monologue                 | 1.829    | 10        | .097     | 0.55     | 4.507    | 9         | .001     | 1.43     |
| Phone Call                | 1.713    | 9         | .121     | 0.54     | 6.196    | 9         | <.001    | 1.96     |
| Cocktail Party            | 3.194    | 10        | .010     | 0.96     | 6.955    | 9         | <.001    | 2.20     |
| Pink                      | 2.489    | 9         | .034     | 0.79     | 4.201    | 9         | .002     | 1.33     |
| Speech Rate               |          |           |          |          |          |           |          |          |
| Conversation              | -1.676   | 10        | .125     | 0.51     | -0.952   | 10        | .364     | 0.29     |
| Monologue                 | 0.350    | 10        | .733     | 0.11     | -0.528   | 10        | .609     | 0.16     |
| Phone Call                | -0.993   | 9         | .347     | 0.31     | -1.169   | 10        | .270     | 0.35     |
| Cocktail Party            | -0.776   | 10        | .456     | 0.23     | -1.101   | 10        | .297     | 0.33     |
| Pink                      | -0.549   | 9         | .596     | 0.17     | -1.013   | 10        | .335     | 0.31     |
| Disfluent Words           |          |           |          |          |          |           |          |          |
| Conversation              | -1.514   | 10        | .161     | 0.46     | 0.453    | 9         | .661     | 0.14     |
| Monologue                 | -0.053   | 10        | .959     | 0.02     | -1.214   | 9         | .256     | 0.38     |
| Phone Call                | -0.996   | 9         | .345     | 0.31     | -0.404   | 9         | .696     | 0.13     |
| Cocktail Party            | -1.626   | 10        | .135     | 0.49     | -0.780   | 9         | .444     | 0.25     |
| Pink                      | -0.465   | 9         | .653     | 0.15     | -1.219   | 9         | .254     | 0.39     |
| Pause Time Ratio          |          |           |          |          |          |           |          |          |
| Conversation              | 0.599    | 10        | .564     | 0.18     | 0.320    | 10        | .756     | 0.10     |
| Monologue                 | -0.809   | 10        | .437     | 0.24     | 0.305    | 10        | .767     | 0.09     |
| Phone Call                | -0.121   | 9         | .906     | 0.04     | -0.289   | 10        | .777     | 0.09     |
| Cocktail Party            | -0.365   | 10        | .723     | 0.11     | 0.051    | 10        | .960     | 0.02     |
| Pink                      | 0.368    | 9         | .721     | 0.12     | -0.131   | 10        | .898     | 0.04     |
| Correct Information Units |          |           |          |          |          |           |          |          |
| Conversation              | -1.188   | 10        | .262     | 0.36     | 0.341    | 10        | .740     | 0.10     |
| Monologue                 | -1.462   | 10        | .174     | 0.44     | 0.611    | 10        | .555     | 0.18     |
| Phone Call                | -1.686   | 9         | .126     | 0.53     | -0.657   | 10        | .526     | 0.20     |

|                             |        |    |      |      |        |    |      |      |
|-----------------------------|--------|----|------|------|--------|----|------|------|
| Cocktail Party              | -0.051 | 10 | .960 | 0.02 | 0.583  | 10 | .573 | 0.18 |
| Pink                        | -1.487 | 9  | .171 | 0.47 | 1.762  | 10 | .109 | 0.53 |
| Lexical-Phonological Errors |        |    |      |      |        |    |      |      |
| Conversation                | -1.993 | 10 | .074 | 0.60 | -0.478 | 10 | .643 | 0.14 |
| Monologue                   | 0.328  | 10 | .750 | 0.10 | 1.460  | 10 | .175 | 0.44 |
| Phone Call                  | -0.826 | 9  | .43  | 0.26 | -2.167 | 10 | .055 | 0.65 |
| Cocktail Party              | -1.623 | 10 | .136 | 0.49 | -0.079 | 10 | .939 | 0.02 |
| Pink                        | 0.684  | 9  | .511 | 0.22 | 0.888  | 10 | .395 | 0.27 |
| Lexical Diversity           |        |    |      |      |        |    |      |      |
| Conversation                | -0.872 | 10 | .404 | 0.26 | 2.127  | 10 | .059 | 0.64 |
| Monologue                   | 0.149  | 10 | .885 | 0.04 | 0.362  | 10 | .725 | 0.11 |
| Phone Call                  | -2.629 | 9  | .027 | 0.83 | 0.795  | 10 | .445 | 0.24 |
| Cocktail Party              | -0.938 | 10 | .371 | 0.28 | 2.239  | 10 | .049 | 0.68 |
| Pink                        | -0.710 | 9  | .496 | 0.22 | 0.746  | 10 | .473 | 0.22 |
| Grammatical Production      |        |    |      |      |        |    |      |      |
| Conversation                | 1.414  | 10 | .188 | 0.43 | 1.794  | 10 | .103 | 0.54 |
| Monologue                   | -0.693 | 10 | .504 | 0.21 | -0.855 | 10 | .413 | 0.26 |
| Phone Call                  | 1.481  | 9  | .173 | 0.47 | -0.241 | 10 | .815 | 0.07 |
| Cocktail Party              | 0.243  | 10 | .813 | 0.07 | -0.159 | 10 | .877 | 0.05 |
| Pink                        | 1.814  | 9  | .103 | 0.57 | 1.777  | 10 | .106 | 0.54 |
| Macrolinguistic Production  |        |    |      |      |        |    |      |      |
| Conversation                | -1.572 | 10 | .147 | 0.47 | -0.683 | 10 | .510 | 0.21 |
| Monologue                   | -0.038 | 10 | .971 | 0.01 | 1.265  | 10 | .234 | 0.38 |
| Phone Call                  | -0.629 | 9  | .545 | 0.20 | 2.013  | 10 | .072 | 0.61 |
| Cocktail Party              | 1.773  | 10 | .107 | 0.53 | 1.559  | 10 | .150 | 0.47 |
| Pink                        | -0.131 | 9  | .899 | 0.04 | 1.872  | 10 | .091 | 0.56 |

*Note.*  $f_0$  = fundamental frequency; dB = intensity in dB SPL at 100 cm.
